# Supplementary material for: Physics-Informed Neural Networks (PINN) for temporal forecasting of monsoon rainfall variability in southern peninsular India
Source: Research Square preprint supplement (doi:10.21203/rs.3.rs-6185189/v1), 2025-06-25
Supplement: Supplementary file 1 [file f2dbccd569046279b9437fbd.docx]

| **States** | **MIN** | **MAX** | **MEAN** | **STD** |
| --- | --- | --- | --- | --- |
| Tamil Nadu | 336.0975 | 2041.18 | 765.8462 | 261.6764 |
| Telangana | 279.2366 | 2033.78 | 919.7408 | 385.7291 |
| Kerala | 668.0433 | 5309.036 | 3219.19 | 1146.618 |
| Karnataka | 185.0469 | 6815.393 | 1004.114 | 1139.212 |
| Andhra Pradesh | 233.0763 | 1696.874 | 692.6957 | 343.763 |
